# Supplementary material
Source: publisher figshare collection journal article supplement (https://acs.figshare.com/ndownloader/files/9069172)
Supplement: Supplementary file 1 [file 9069172]

Compound	Smiles	BRPF1 DSF DTm /oC	BRPF1 BROMOScan IC50 /nM	BRPF2 BROMOScan IC50 /nM	BRPF3 BROMOScan IC50 /nM	BRD9 BROMOScan IC50 /nM	BRD4(BD1) BROMOScan IC50 /nM
1	CN1C2=CC=C(NS(C)(=O)=O)C=C2C=CC1=O	1.4	2200
2	CN1C2=CC=C(NS(CC)(=O)=O)C=C2C=CC1=O	1.8	1200
3	CN1C2=CC=C(NS(C(C)C)(=O)=O)C=C2C=CC1=O	2.2	1100
4	CN1C2=CC=C(NS(C3CC3)(=O)=O)C=C2C=CC1=O	1.9	520
5	CN1C2=CC=C(NS(C3CCCCC3)(=O)=O)C=C2C=CC1=O	3.9	380
6	CN1C2=CC=C(NS(C3=CC=CC=C3)(=O)=O)C=C2C=CC1=O	5.3	65	1400	7600	2200	1700
7	CN1C2=CC=C(NS(C3=C(C#N)C=CC=C3)(=O)=O)C=C2C=CC1=O	2.4	430	1700
8	CN1C2=CC=C(NS(C3=CC(C#N)=CC=C3)(=O)=O)C=C2C=CC1=O	4.4	56	270
9	CN1C2=CC=C(NS(C3=CC=C(C#N)C=C3)(=O)=O)C=C2C=CC1=O	5.2	43	200	1000	910	2800
10	CN1C2=CC=C(S(NC3=CC=CC=C3)(=O)=O)C=C2C=CC1=O	3.5	1000	7800	>100,000	9800	37,000
11	CN1C2=CC=C(S(NC3=C(C#N)C=CC=C3)(=O)=O)C=C2C=CC1=O	2.6
12	CN1C2=CC=C(S(NC3=CC(C#N)=CC=C3)(=O)=O)C=C2C=CC1=O	2.3
13	CN1C2=CC=C(S(NC3=CC=C(C#N)C=C3)(=O)=O)C=C2C=CC1=O	3.1	100	150	2200
14	CN1C2=CC=C(NS(C3=C(OC)C=CC=C3)(=O)=O)C=C2C=C(C)C1=O	10.2	9	130			600
15	CN1C2=CC=C(NS(C3=CC=C(C#N)C=C3)(=O)=O)C=C2C=C(C)C1=O	9.7	7.9	48	260	310	4500
16	CN1C2=CC=C(NS(C3=C(OC)C=C(C#N)C=C3)(=O)=O)C=C2C=C(C)C1=O	12.3	3.1	46	140	520	3700
17	CN1C2=CC=C(NS(C3=CC=C(C#N)C=C3)(=O)=O)C=C2C=C(CC)C1=O	5.6	180
18	CN1C2=CC=C(NS(C3=C(OC)C=C(C#N)C=C3)(=O)=O)C=C2C=C(CC)C1=O	8	93
19	CN1C2=CC=C(NS(C3=CC=C(C#N)C=C3)(=O)=O)C=C2C=C(C(C)C)C1=O		870	14,000	16,000
20	CN1C2=CC=C(NS(C3=C(OC)C=C(C#N)C=C3)(=O)=O)C=C2C=C(C(C)C)C1=O		170	3300	4600	9300
21	CN1C2=CC=C(NS(C3=CC=C(C#N)C=C3)(=O)=O)C=C2C(C)=CC1=O	4.3	24	150
22	CN1C2=CC=C(NS(C3=CC=C(C#N)C=C3)(=O)=O)C(F)=C2C=CC1=O	2.7
23	CN1C2=CC(OC)=C(NS(C3=CC=CC=C3)(=O)=O)C=C2C=CC1=O	6.3	29	380	2200
24	CN1C2=CC(OC)=C(NS(C3=CC=C(C#N)C=C3)(=O)=O)C=C2C=CC1=O	5.6	53	520	2200	2700	>10,000
25	CN1C2=CC(OCC)=C(NS(C3=CC=C(C#N)C=C3)(=O)=O)C=C2C=CC1=O		55
26	CN1C2=CC(OC(C)C)=C(NS(C3=CC=C(C#N)C=C3)(=O)=O)C=C2C=CC1=O		39
27	CN1C2=CC(F)=C(NS(C3=CC=C(C#N)C=C3)(=O)=O)C=C2C=CC1=O	3.8
28	CN1C2=CC(OC)=C(NS(C3=CC=CC=C3)(=O)=O)C=C2C=C(C)C1=O	9.4	17	190	590
29	CN1C2=CC(OC)=C(NS(C3=C(OC)C=CC=C3)(=O)=O)C=C2C=C(C)C1=O	11
30	CN1C2=CC(OC)=C(NS(C3=CC=C(C#N)C=C3)(=O)=O)C=C2C=C(C)C1=O	8.8	15	100	280
31	CN1C2=CC(OC)=C(NS(C3=C(C)C=C(C#N)C=C3)(=O)=O)C=C2C=C(C)C1=O	9.9
32	CN1C2=CC(OC)=C(NS(C3=C(OC)C=C(C#N)C=C3)(=O)=O)C=C2C=C(C)C1=O	12.7	12	80	190	170	1700
33	CN1C2=CC(OC)=C(NS(C3=C(OCC)C=C(C#N)C=C3)(=O)=O)C=C2C=C(C)C1=O	9.5
34	CN1C2=C(F)C=C(NS(C3=CC=C(C#N)C=C3)(=O)=O)C=C2C=C(C)C1=O	7.1
35	CN1C2=C(F)C=C(NS(C3=C(OC)C=C(C#N)C=C3)(=O)=O)C=C2C=C(C)C1=O	6.8	12
36	O=C1N(CC)C2=CC=C(NS(C3=CC=C(C#N)C=C3)(=O)=O)C=C2C=C1CC		>100,000	>100,000	>100,000	>100,000	>100,000
37	O=C1N(CC)C2=CC=C(NS(C3=C(OC)C=C(C#N)C=C3)(=O)=O)C=C2C=C1CC		250	4400	4600
38	CN1C2=CC=C(N(C)S(C3=CC=C(C#N)C=C3)(=O)=O)C=C2C=CC1=O	1.8	910	6700
39	CN1C2=CC(OC)=C(N(C)S(C3=CC=C(C#N)C=C3)(=O)=O)C=C2C=CC1=O		1000
40	CN1C2=CC=C(N(C)S(C3=C(OC)C=C(C#N)C=C3)(=O)=O)C=C2C=C(C)C1=O	7.1	52
41	CN1C2=CC=C(N(CC)S(C3=C(OC)C=C(C#N)C=C3)(=O)=O)C=C2C=C(C)C1=O		110
42	CN1C2=CC=C(N(C(C)C)S(C3=C(OC)C=C(C#N)C=C3)(=O)=O)C=C2C=C(C)C1=O		160
